# Supplementary material
Source: PubMed Central journal article supplement (PMC4120980)
Supplement: jo501214b_si_003.pdf [file jo501214b_si_003.pdf]

**Studies on C<sub>20</sub>-Diterpenoid Alkaloids: Synthesis of the  
Hetidine Framework and its Application to the  
Synthesis of Dihydronavirine and the Atisine Skeleton**

Amy M. Hamlin, David Lapointe, Kyle Owens, and Richmond Sarpong\*

College of Chemistry, *University of California, Berkeley*

Berkeley, California 94720

[rsarpong@berkeley.edu](mailto:rsarpong@berkeley.edu)

SUPPORTING INFORMATION

## Table of Contents

|                                                |            |
|------------------------------------------------|------------|
| General Experimental Details.....              | S2         |
| Selected NMR Spectra.....                      | S4-<br>S16 |
| X-ray Crystallography Data for <b>31</b> ..... | S17-S19    |
| X-ray Crystallography Data for <b>63</b> ..... | S20-S22    |

## General Experimental Details

All reagents were obtained from commercial chemical suppliers and used without further purification unless otherwise noted. All reactions were performed in round-bottomed flasks or microwave vials sealed with rubber septa, under an atmosphere of nitrogen, and stirred with a Teflon<sup>TM</sup>-coated magnetic stir bar unless otherwise noted. Temperatures above 23 °C were controlled by a temperature modulator. Microwave reactions were performed in a Biotage® Initiator Microwave Reactor equipped with an external IR sensor to monitor reaction temperature. Pre-dried tetrahydrofuran (THF), benzene, toluene, acetonitrile (MeCN), methanol (MeOH), and triethylamine (Et<sub>3</sub>N), were degassed with argon for 60 min and passed through activated alumina columns. Dichloromethane (CH<sub>2</sub>Cl<sub>2</sub>) was distilled over calcium hydride before use. Reactions were monitored by thin layer chromatography (TLC) using Silicycle Siliaplate<sup>TM</sup> glass backed TLC plates (250 μm thickness, 60 Å porosity, F- 254 indicator) and visualized using UV (254 nm) and *p*-anisaldehyde stain or KMnO<sub>4</sub> stain. Volatile solvents were removed using a rotary evaporator under reduced pressure. Silica gel chromatography was performed using Sorbent Technologies 60 Å, 230 x 400 mesh silica gel (40-63 μm).

$^1\text{H}$  NMR and  $^{13}\text{C}$  NMR were obtained in  $\text{CDCl}_3$  on 400, 500, or 600 MHz spectrometers with  $^{13}\text{C}$  operating frequencies of 100, 126, or 151 MHz, respectively. Chemical shifts are reported in parts per million ( $\delta$ ) relative to residual chloroform (7.26 ppm for  $^1\text{H}$  and 77.16 ppm for  $^{13}\text{C}$ ). Data for  $^1\text{H}$  NMR spectra are reported as follows: chemical shift (multiplicity, coupling constants, number of hydrogens). Multiplicity is designated as s (singlet), d (doublet), t (triplet), q (quartet), p (pentet), or m (multiplet). IR spectra were obtained as thin films on NaCl plates and reported in frequency of absorption ( $\text{cm}^{-1}$ ). High-resolution mass spectral (HRMS) data was obtained using either electrospray ionization (ESI) or electron impact (EI) techniques. High-resolution ESI was obtained on an LTQ-FT (ion trap) and the data was analyzed using Excalibur. High-resolution EI was obtained on an Autospec (magnetic sector) and the data was analyzed using MassLynx.

Procedures and supporting information for the synthesis of **14** and the X-ray crystallography data for **29**, **35** and **14** can be found in the previous communication ("Gallium(III)-Catalyzed Cycloisomerization Approach to the Diterpenoid Alkaloids: Construction of the Core Structure for the Hetidines and Hetisines" Hamlin, A. M.; Cortez, F. de J.; Lapointe, D.; Sarpong, R. *Angew. Chem. Int. Ed.* **2013**, *52*, 4854. DOI: 10.1002/anie.201209030). Spectra that are included in this supporting information are supplemental to those reported in the previous communication. Spectra for the synthesis of dihydronavirine (**8**) and the atisine core (**63**) are also included in this supporting information.

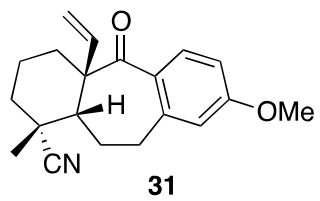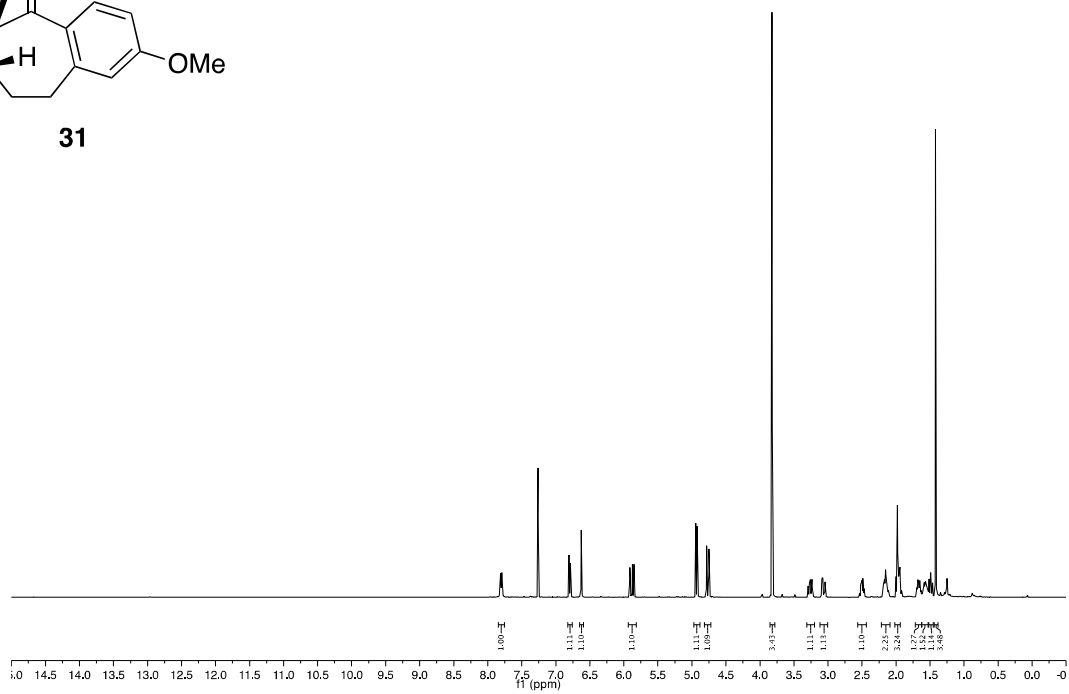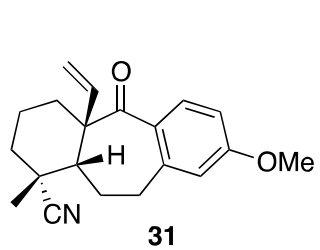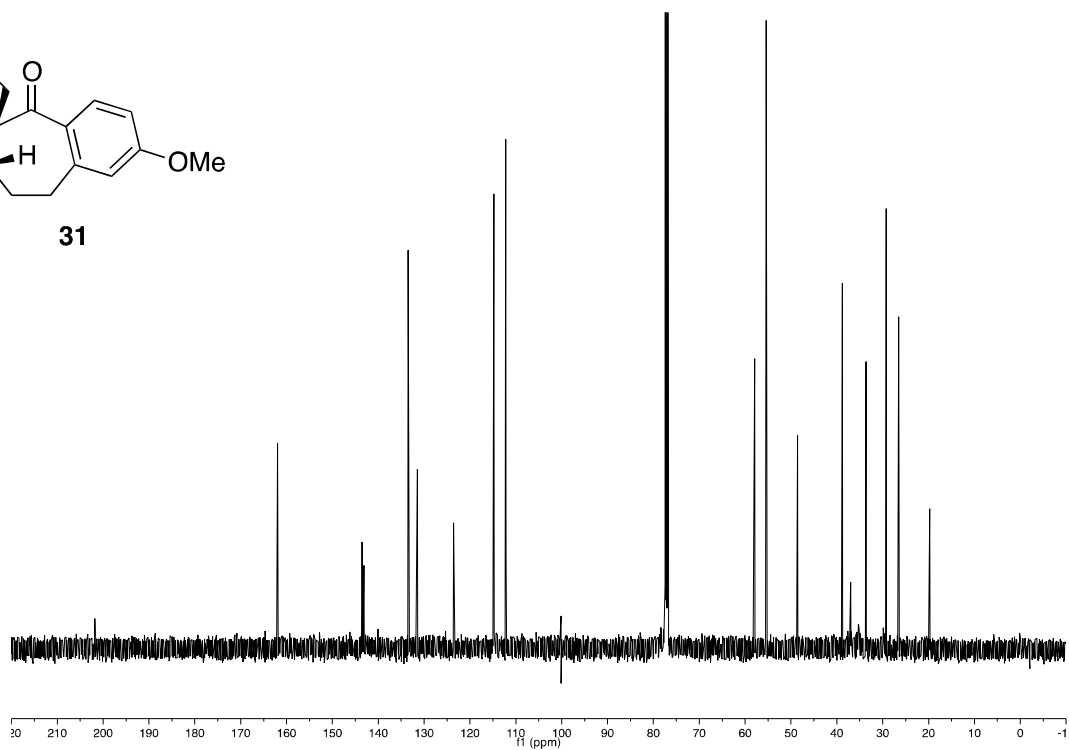

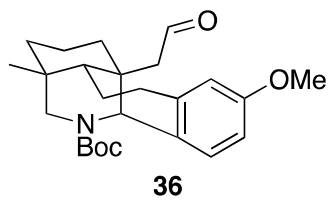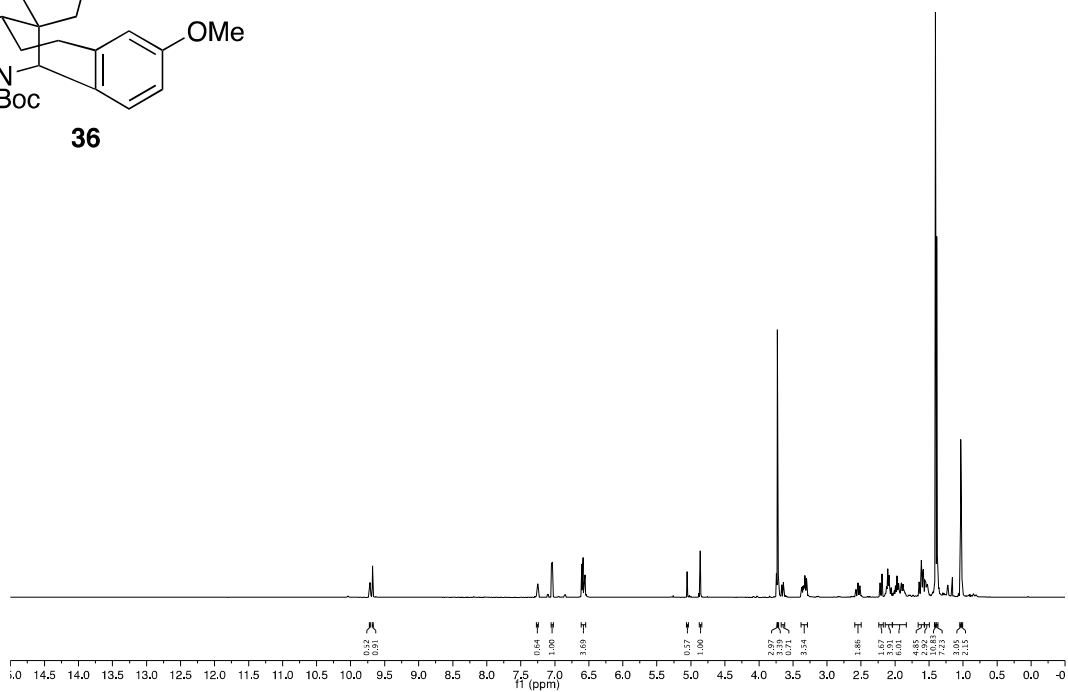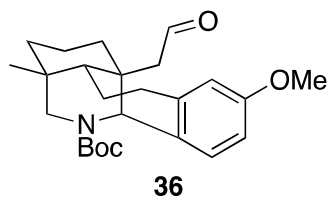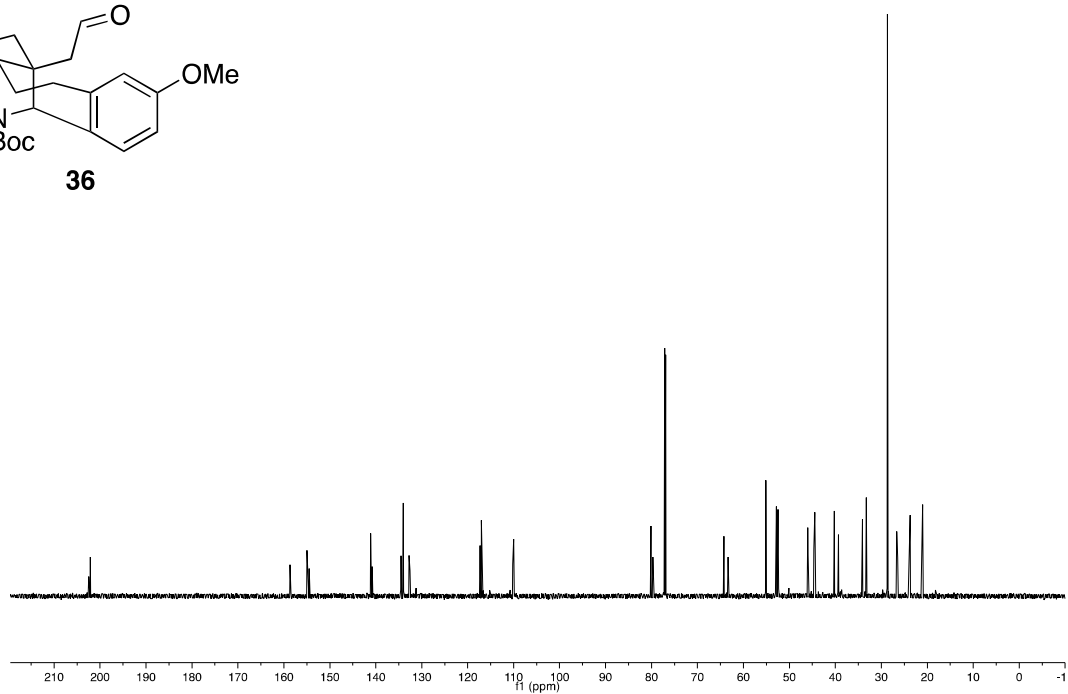

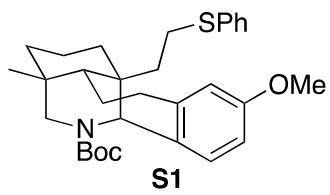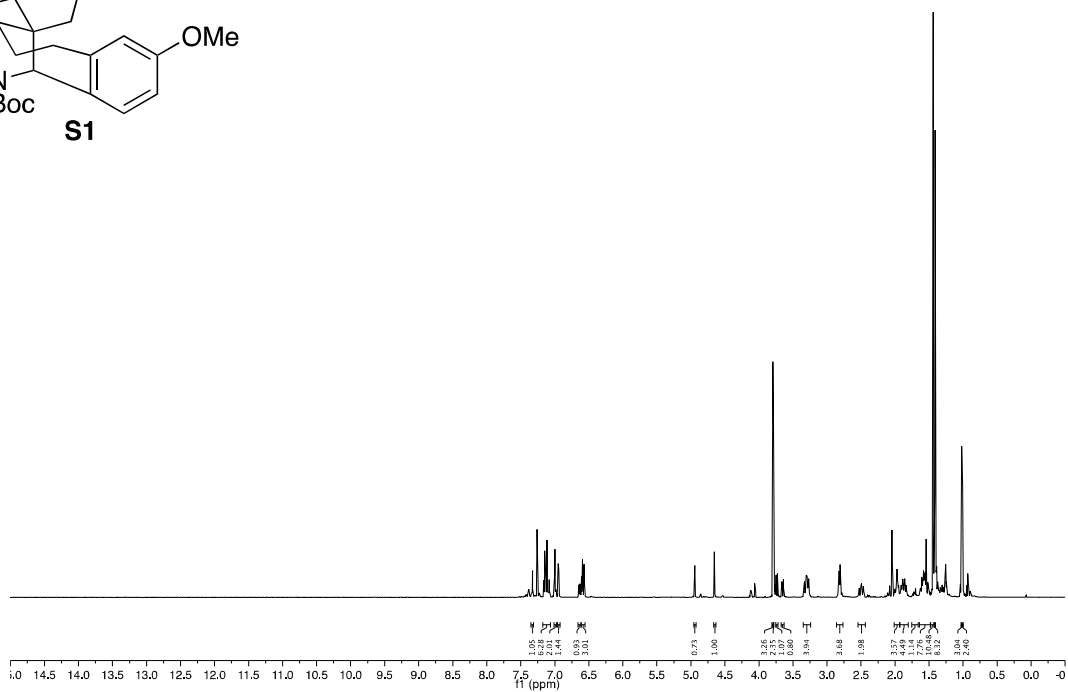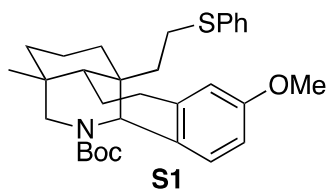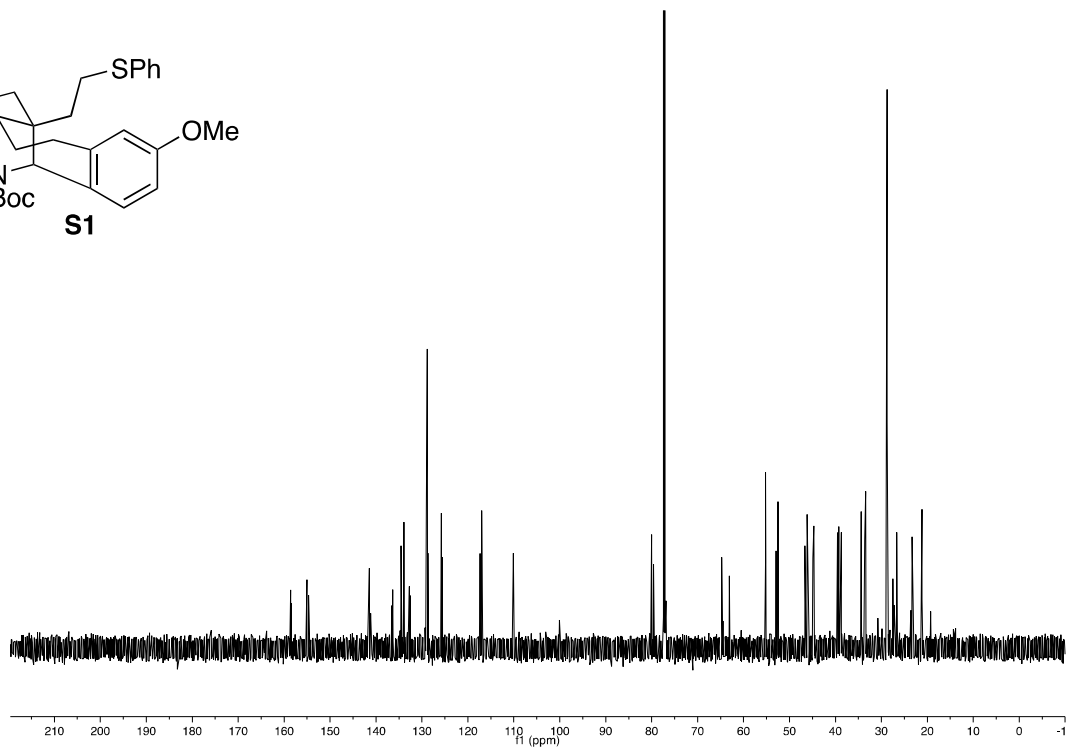

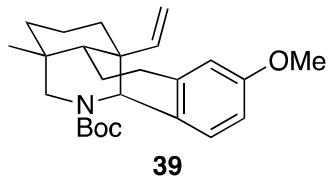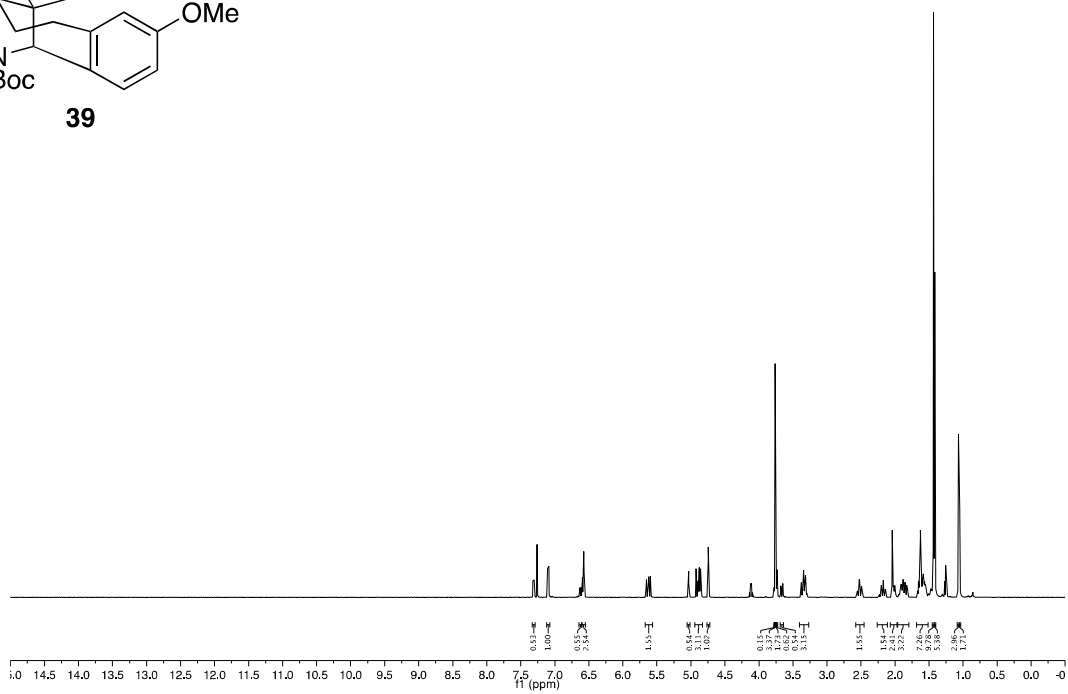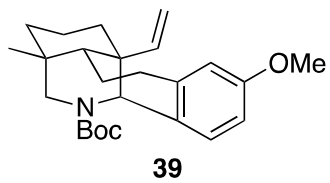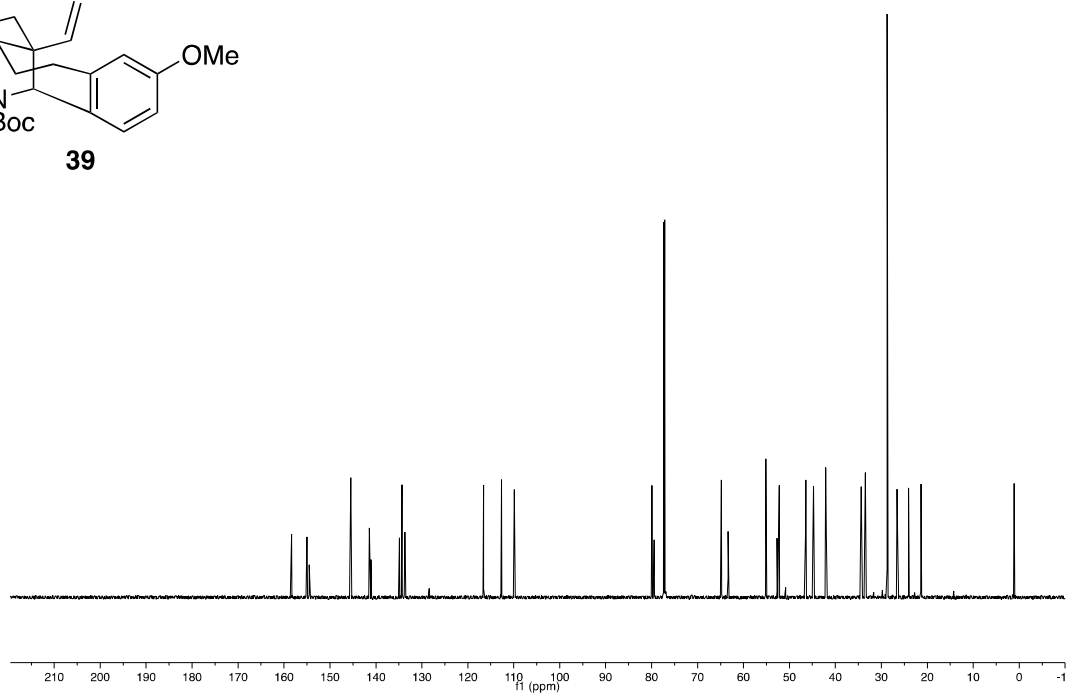

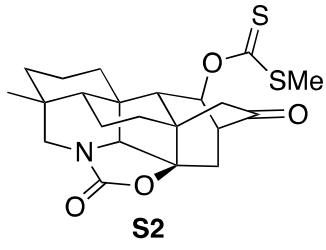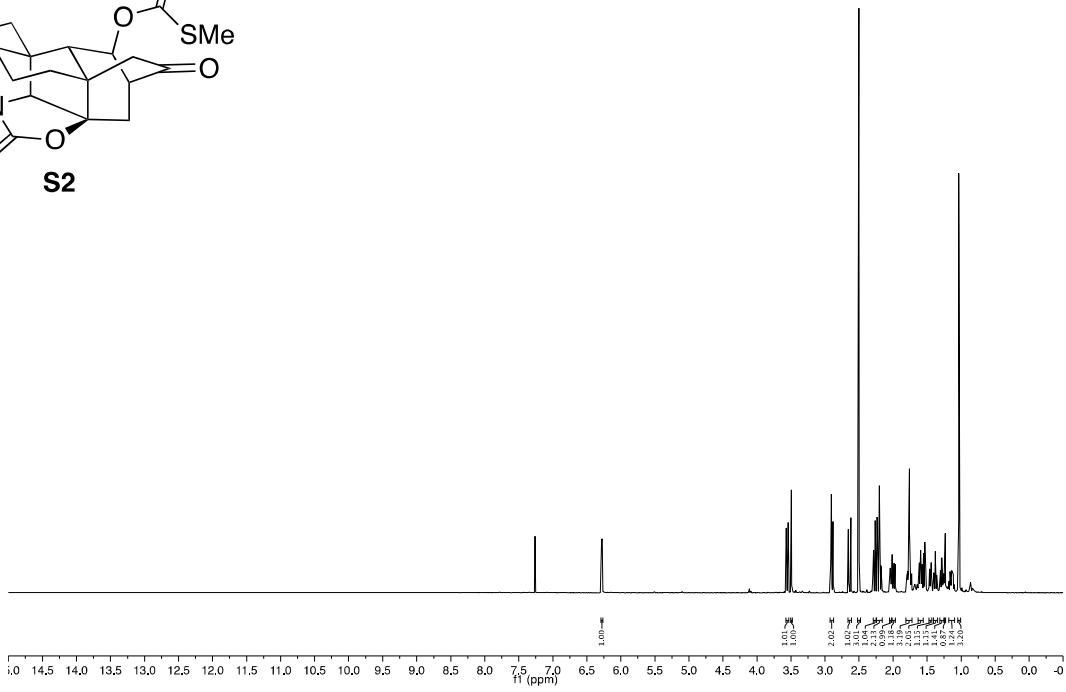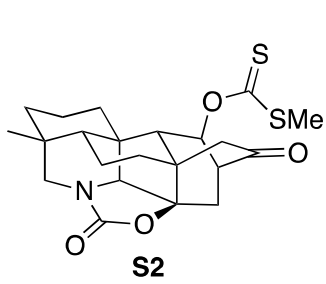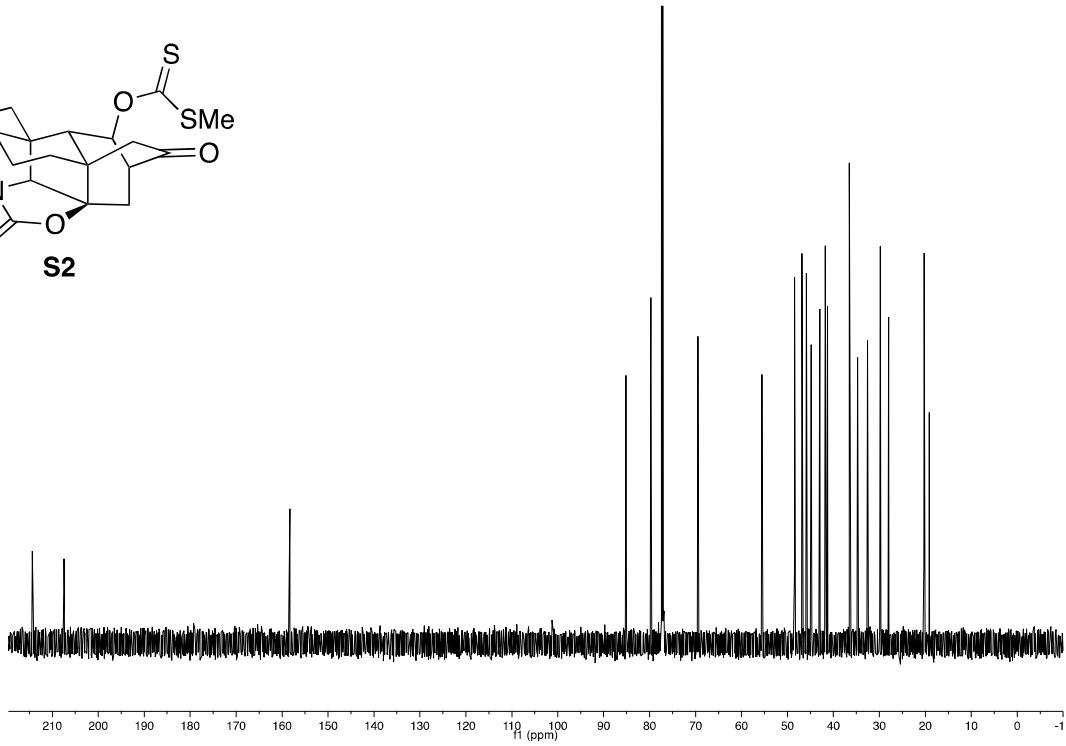



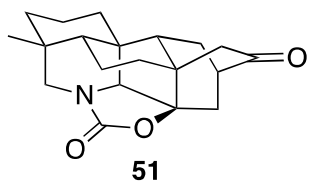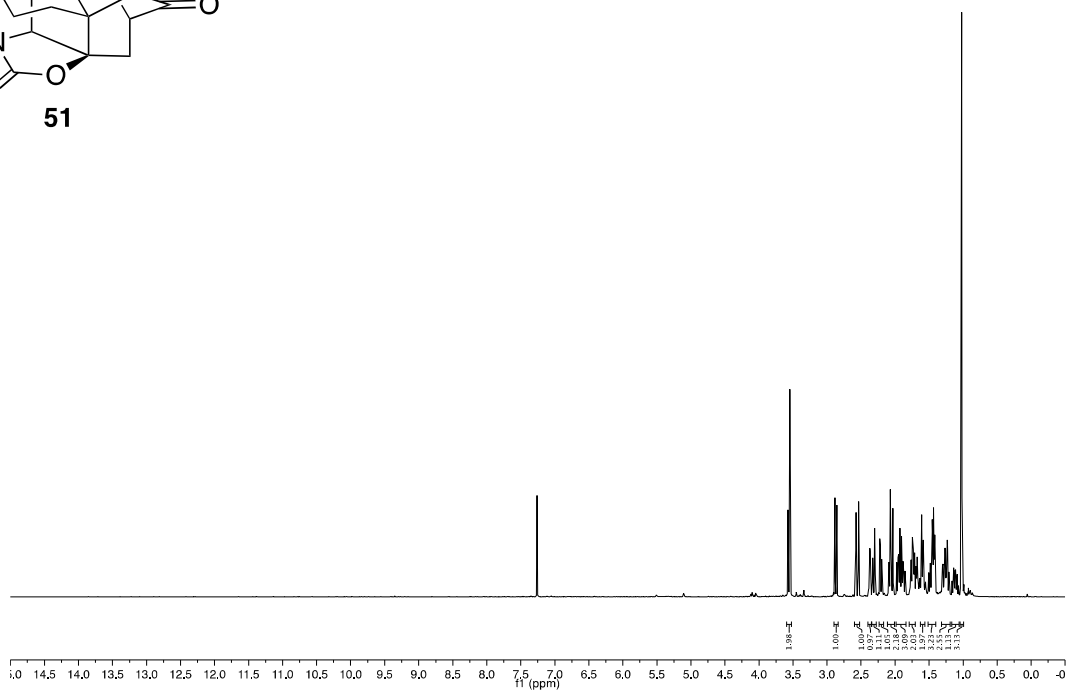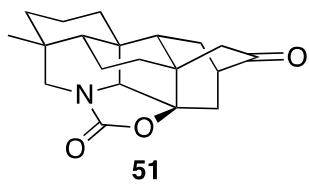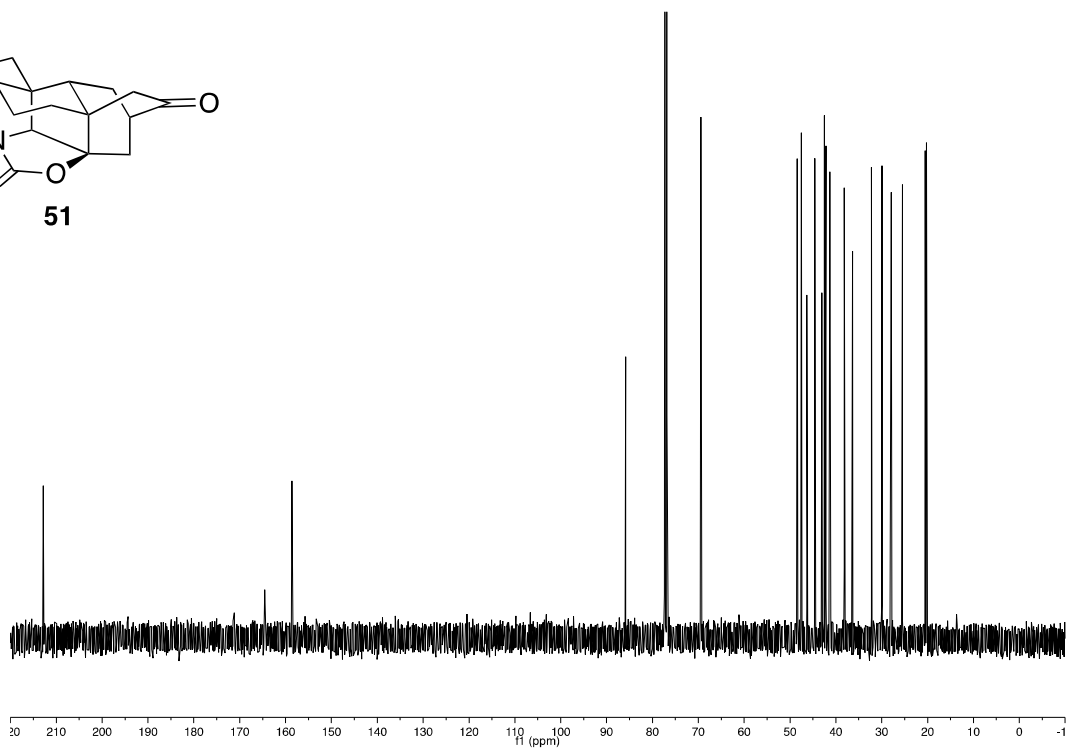

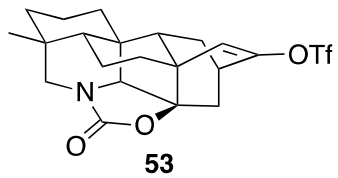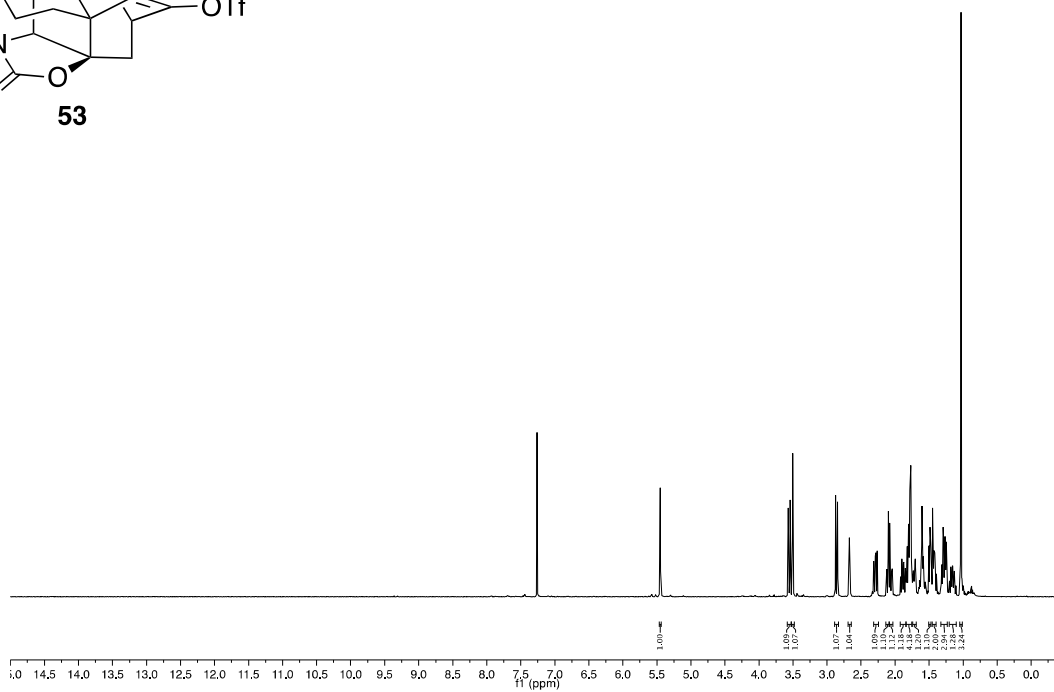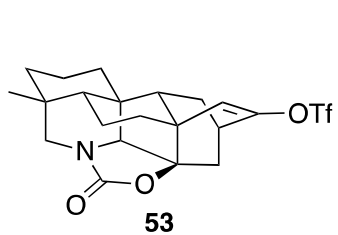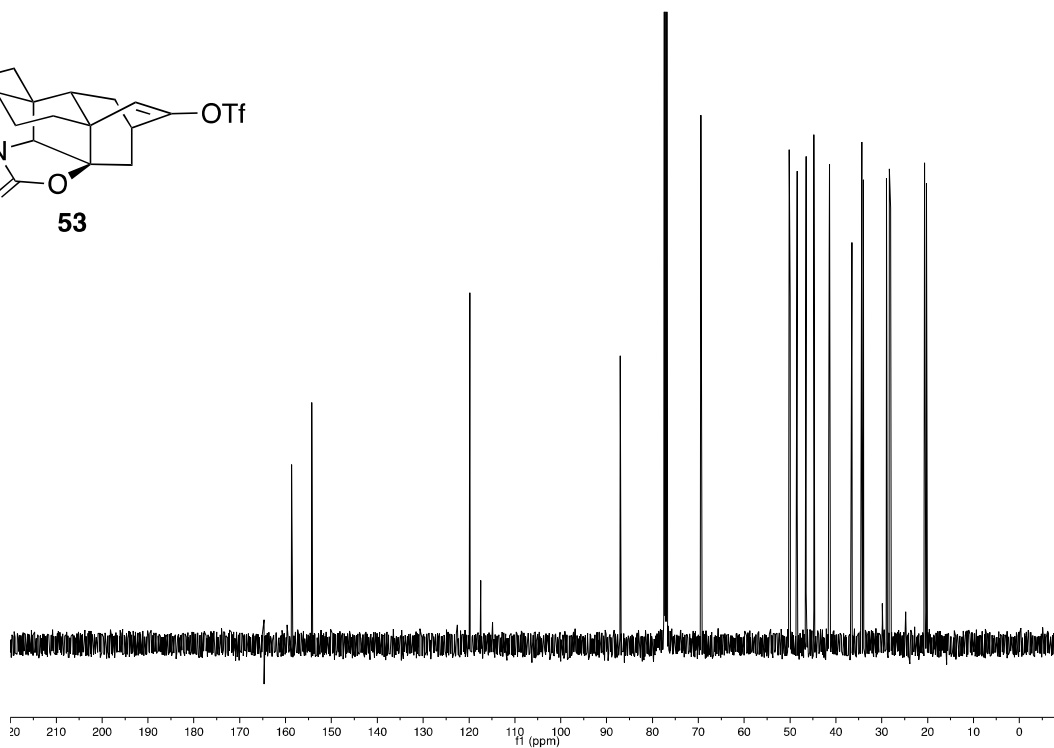

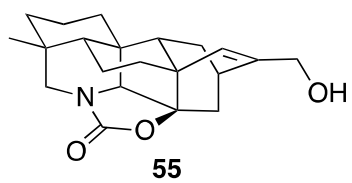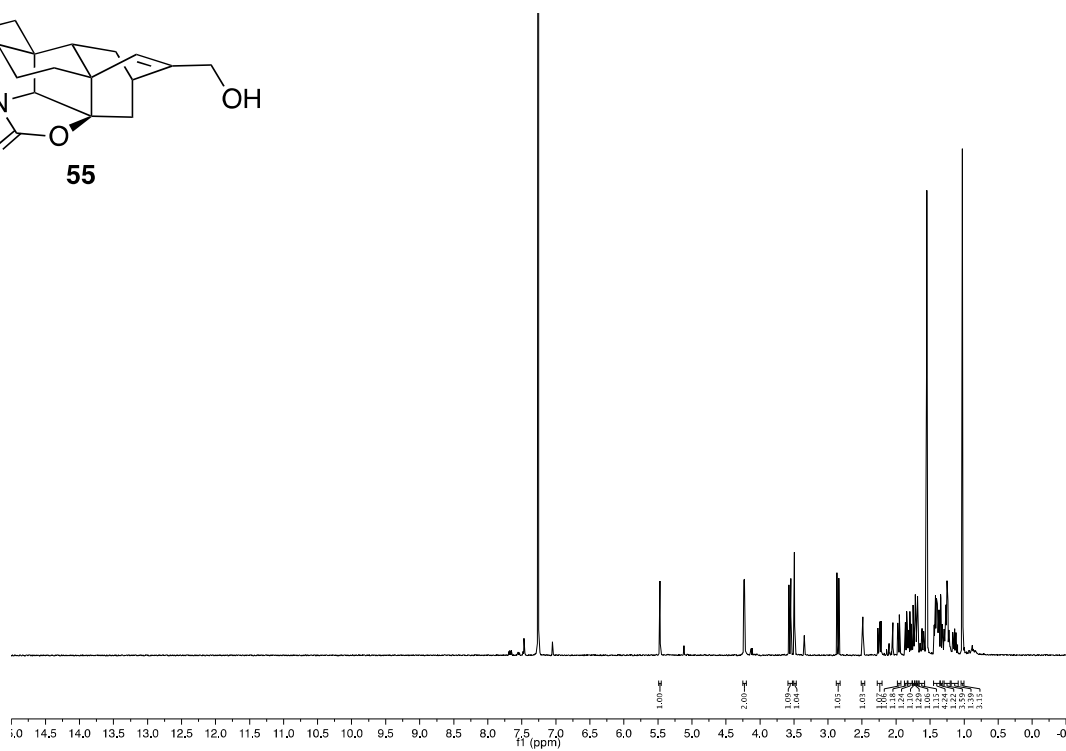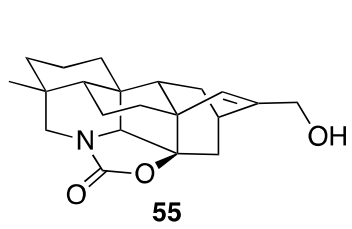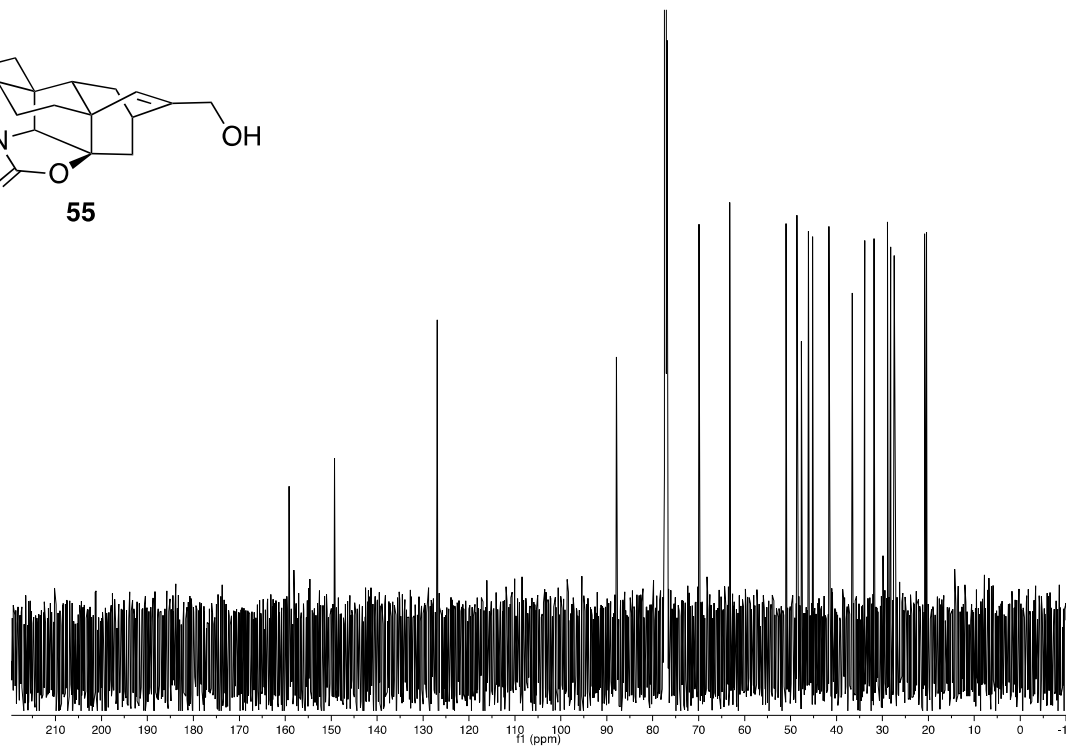

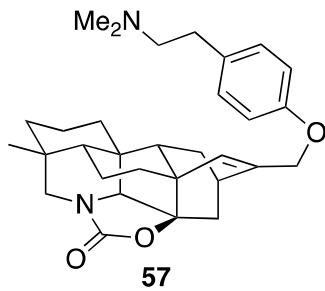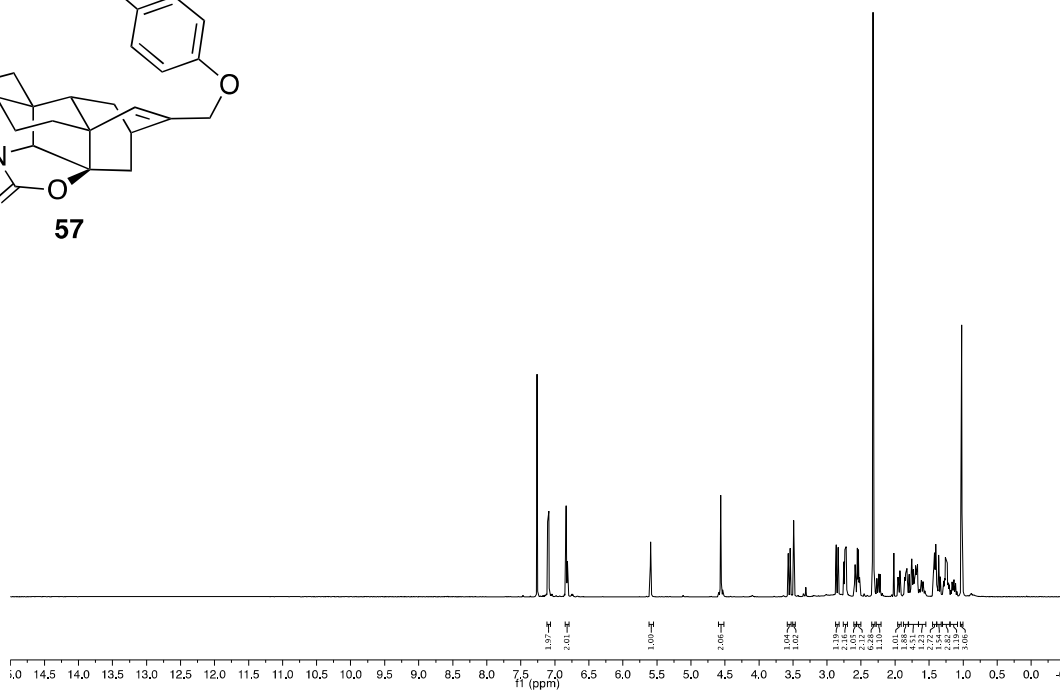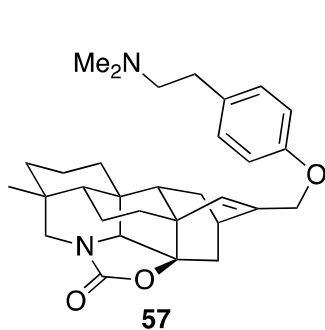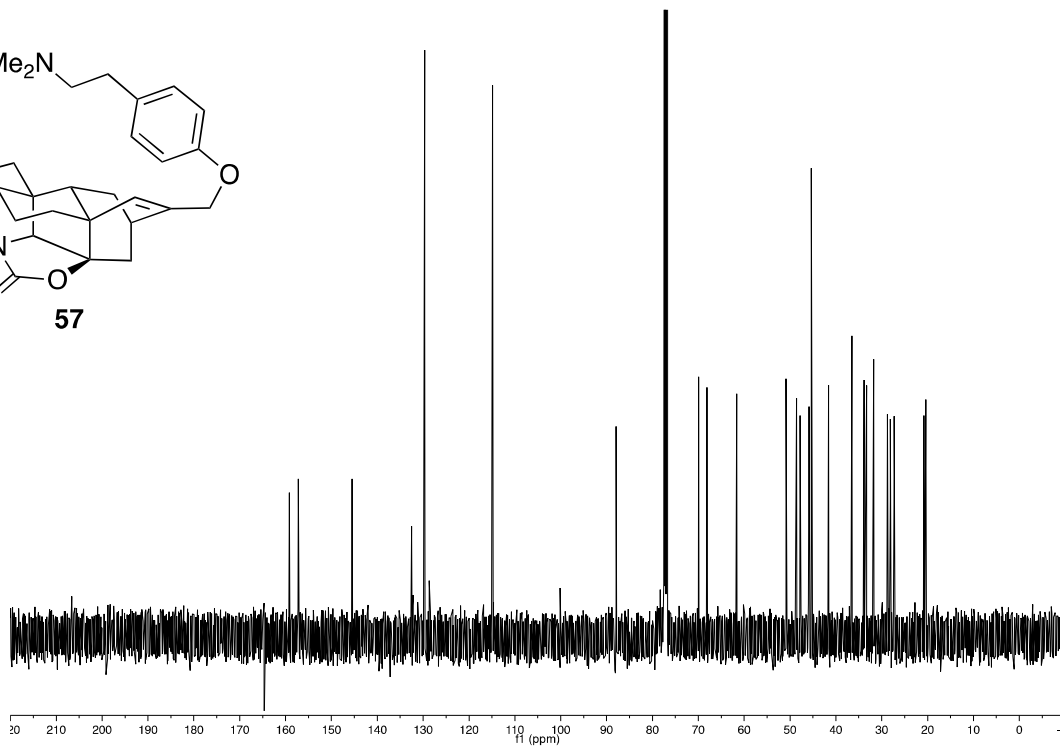

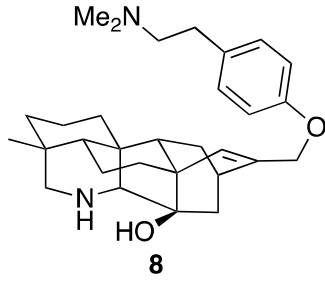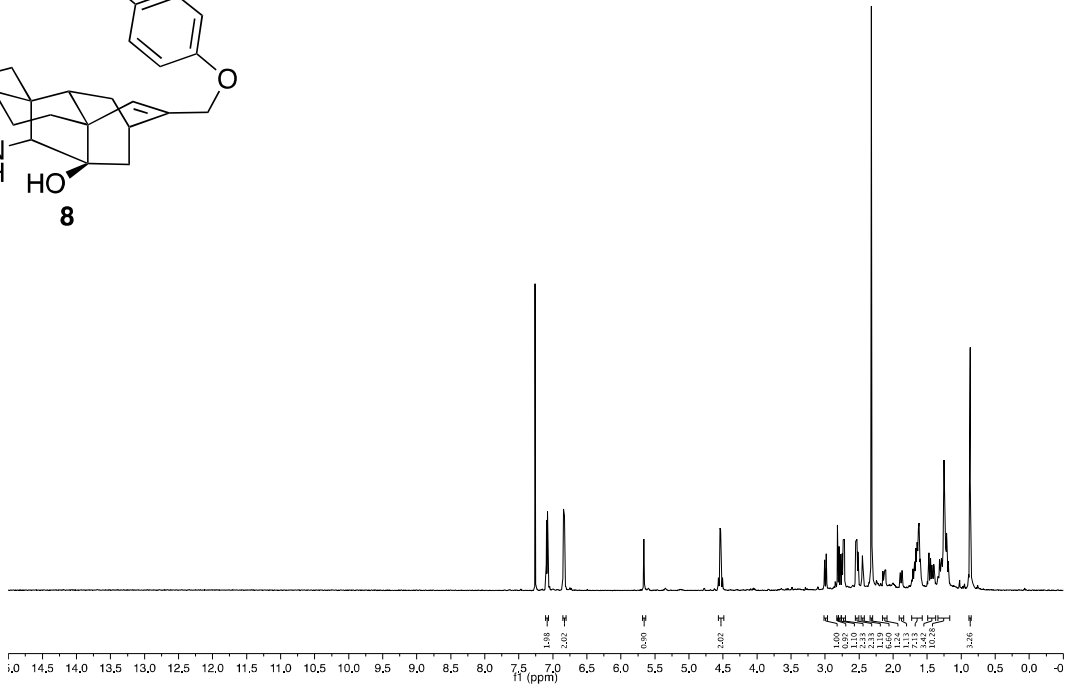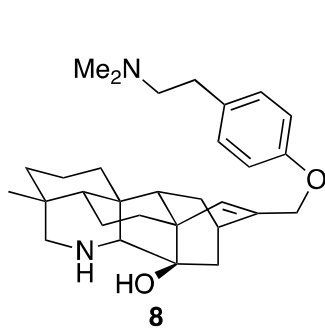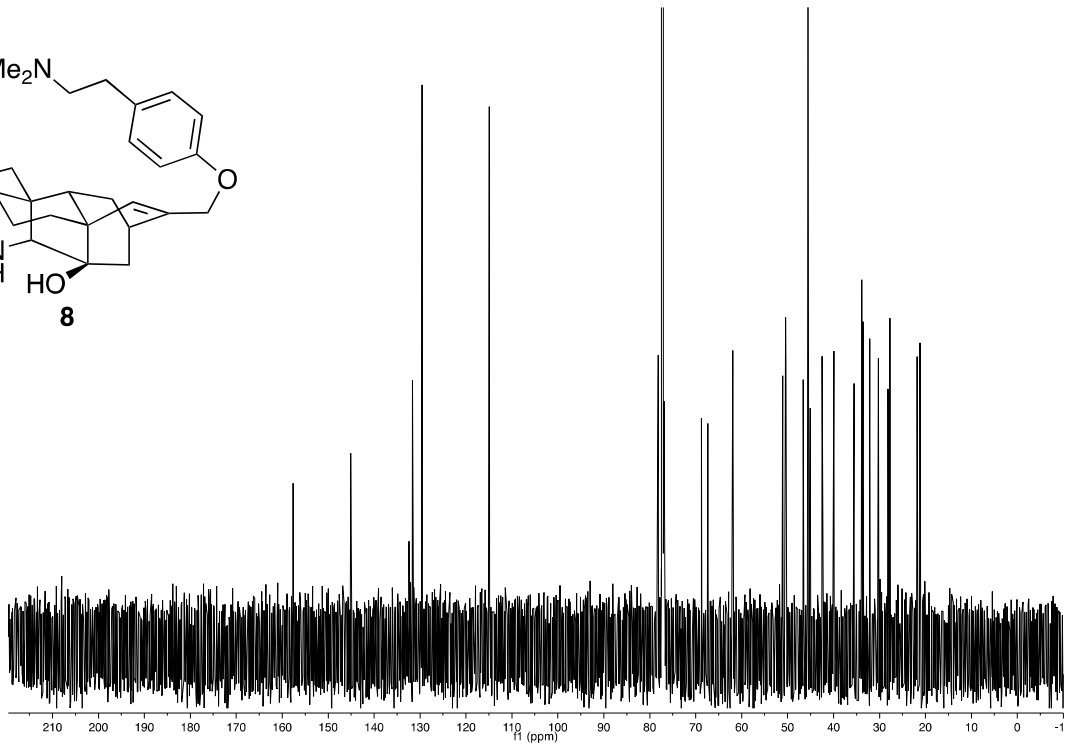

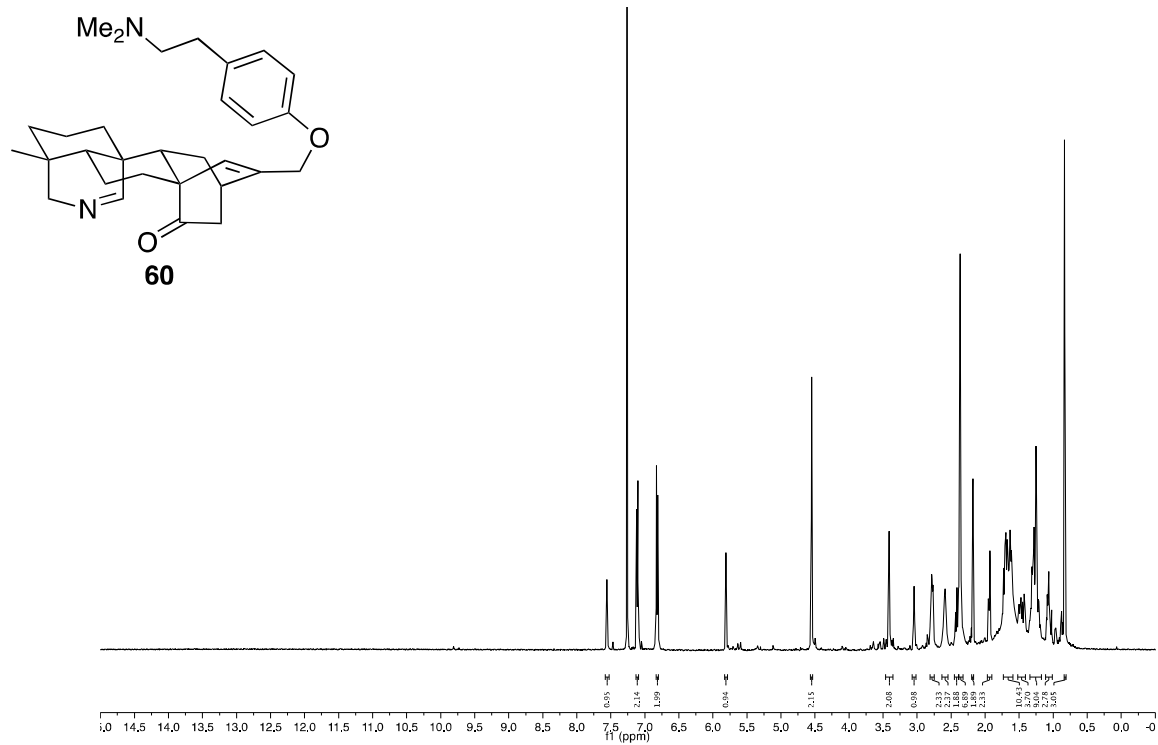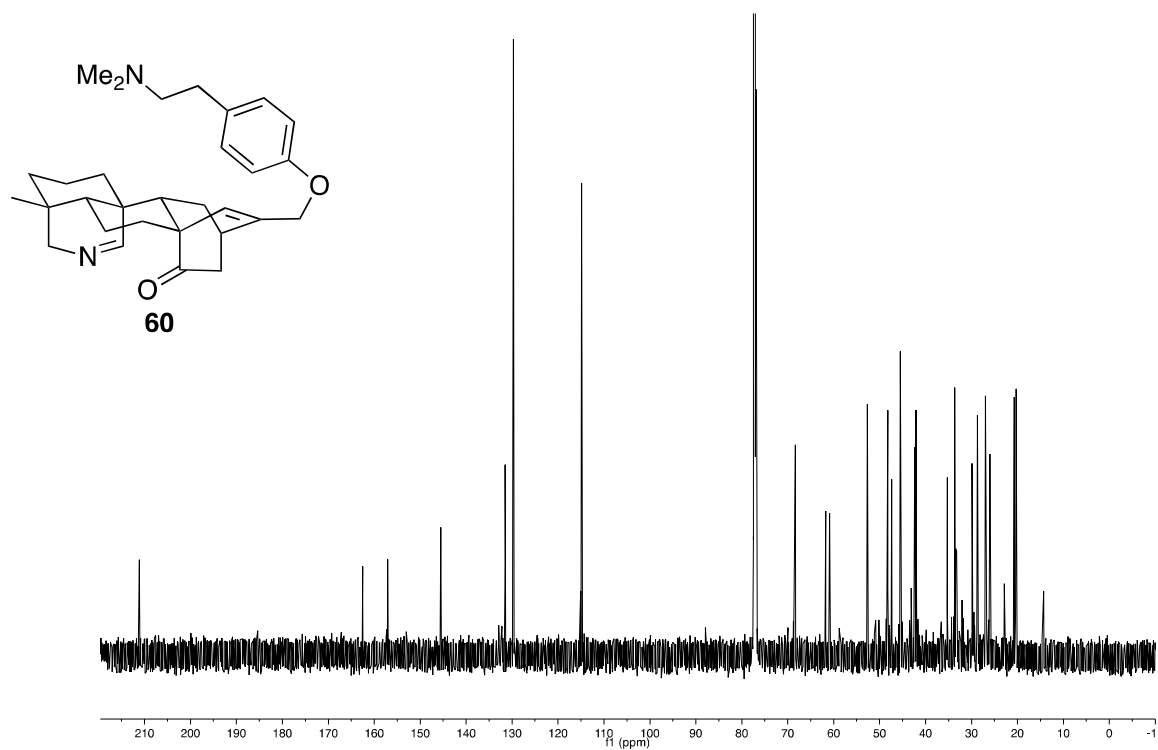

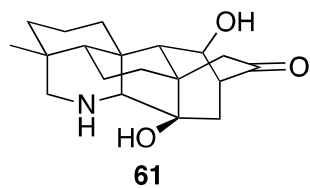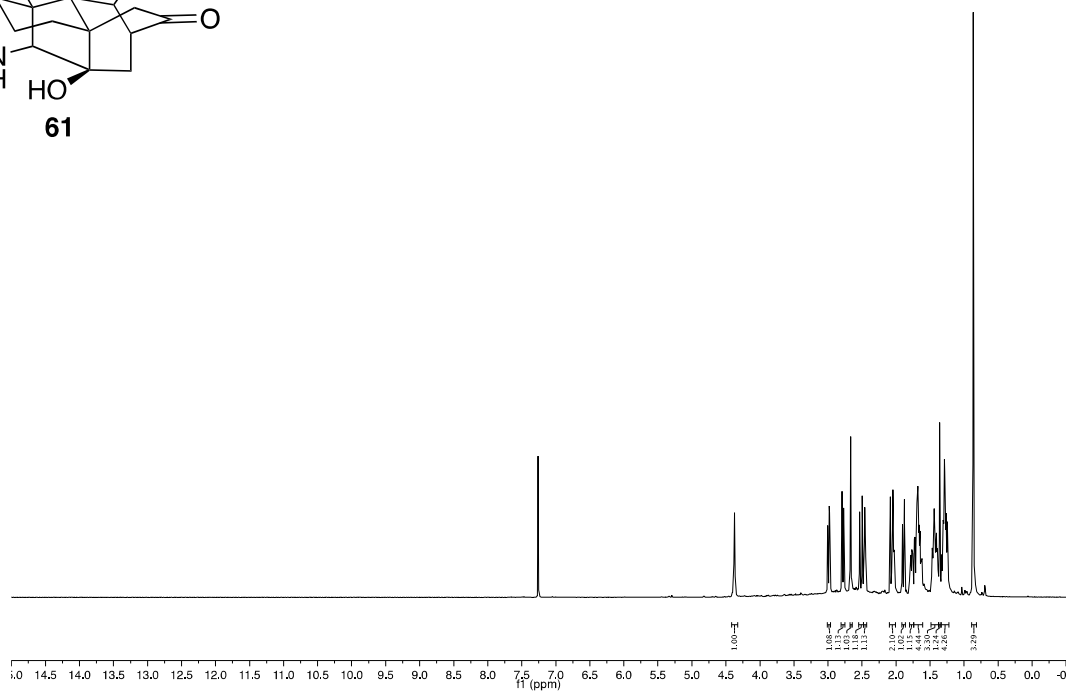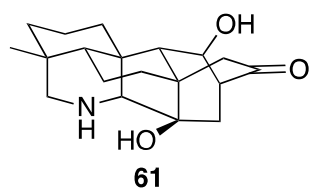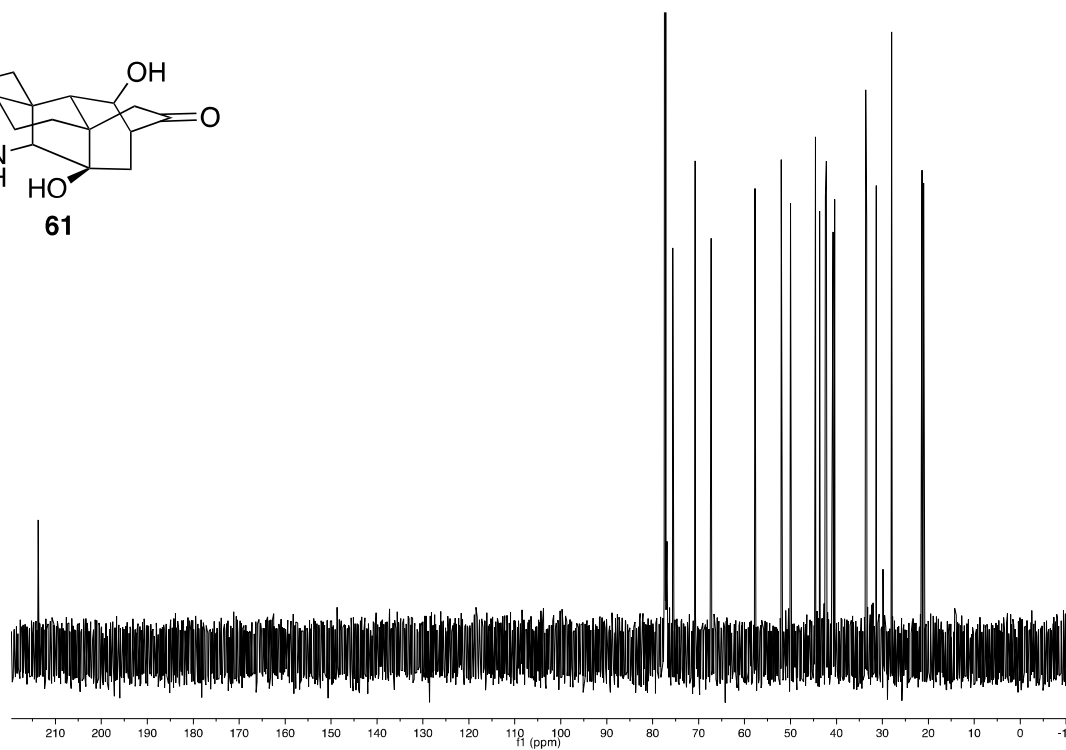

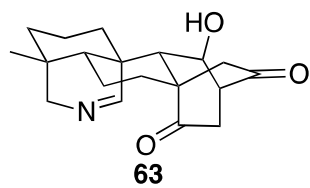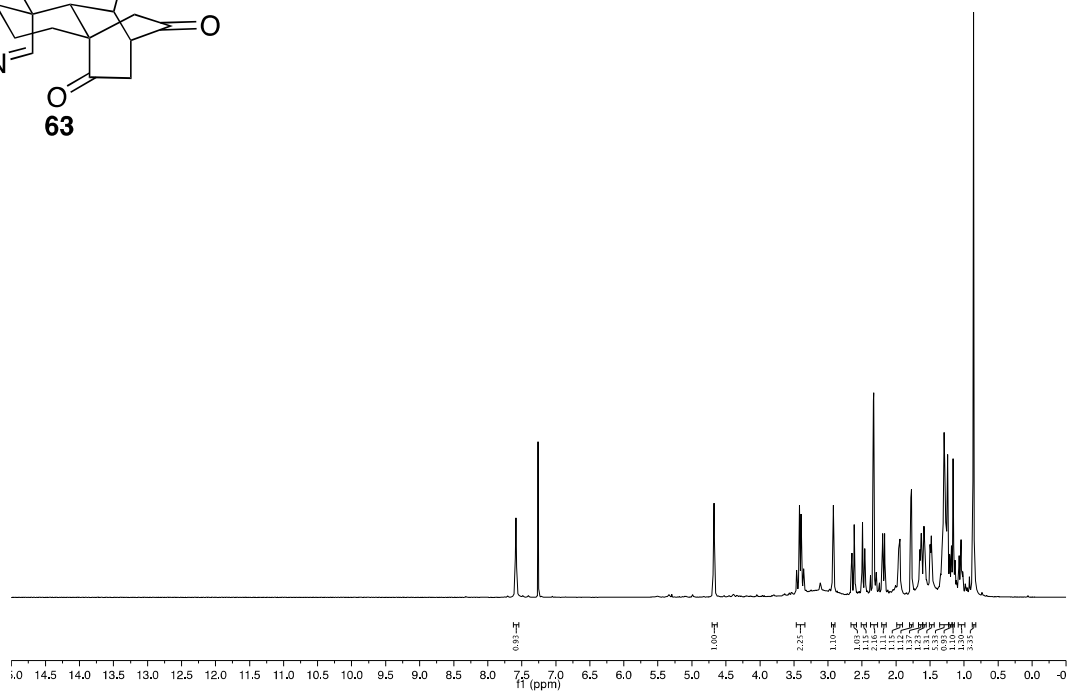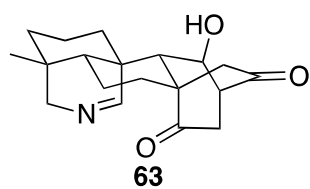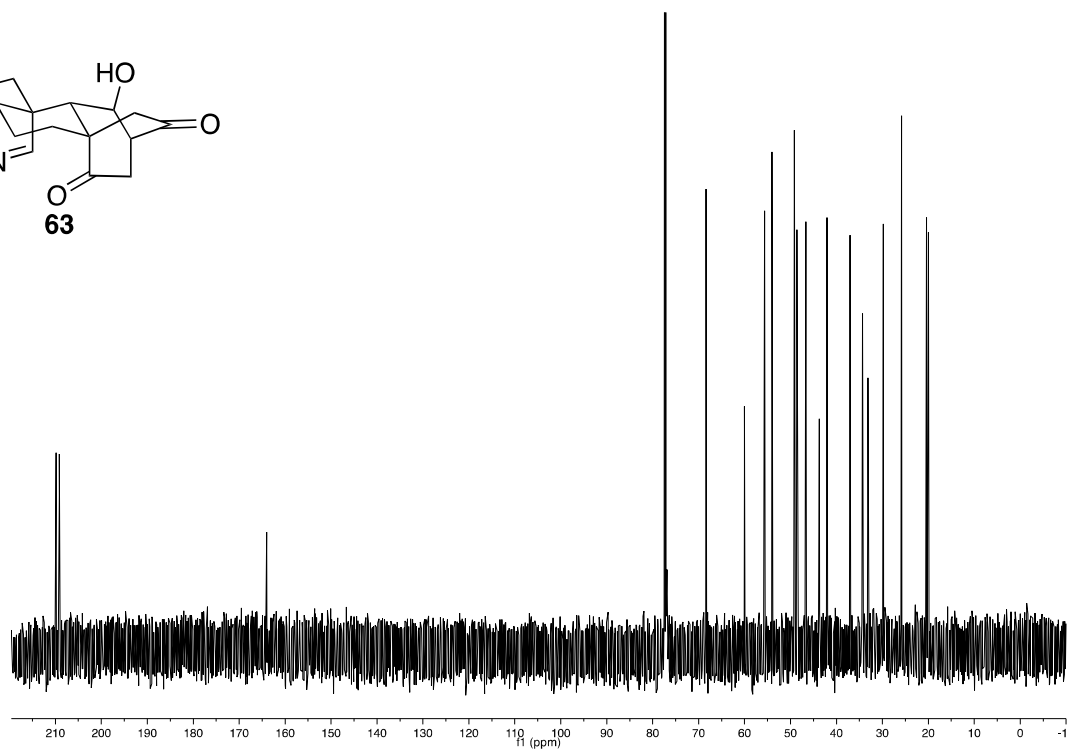



## X-Ray Crystallography Data for 31

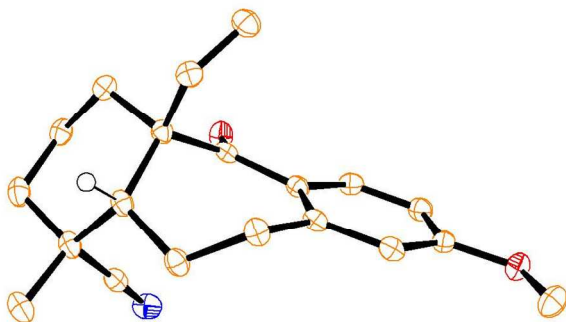

## X-Ray Data and Crystal Refinement for 31

A colorless prism 0.150 x 0.100 x 0.100 mm in size was mounted on a Cryoloop with Paratone oil. Data were collected in a nitrogen gas stream at 100(2) K using phi and omega scans. Crystal-to-detector distance was 60 mm and exposure time was 5 seconds per frame using a scan width of 2.0°. Data collection was 98.3% complete to 67.000° in  $q$ . A total of 21234 reflections were collected covering the indices,  $-10 \leq h \leq 10$ ,  $-20 \leq k \leq 20$ ,  $-13 \leq l \leq 10$ . 2613 reflections were found to be symmetry independent, with an  $R_{\text{int}}$  of 0.0242. Indexing and unit cell refinement indicated a C-centered, monoclinic lattice. The space group was found to be C c (No. 9). The data were integrated using the Bruker SAINT software program and scaled using the SADABS software program. Solution by iterative methods (SHELXT) produced a complete heavy-atom phasing model consistent with the proposed structure. All non-hydrogen atoms were refined anisotropically by full-matrix least-squares (SHELXL-2014). All hydrogen atoms were placed using a riding model. Their positions were constrained relative to their parent atom using the appropriate HFIX command in SHELXL-2014.

|                                 |                                                  |                    |
|---------------------------------|--------------------------------------------------|--------------------|
| Empirical formula               | C <sub>20</sub> H <sub>23</sub> N O <sub>2</sub> |                    |
| Formula weight                  | 309.39                                           |                    |
| Temperature                     | 100(2) K                                         |                    |
| Wavelength                      | 1.54178 Å                                        |                    |
| Crystal system                  | Monoclinic                                       |                    |
| Space group                     | C c                                              |                    |
| Unit cell dimensions            | a = 8.9580(4) Å                                  | a = 90°.           |
|                                 | b = 17.1507(9) Å                                 | b = 107.6180(10)°. |
|                                 | c = 11.2099(5) Å                                 | g = 90°.           |
| Volume                          | 1641.46(14) Å <sup>3</sup>                       |                    |
| Z                               | 4                                                |                    |
| Density (calculated)            | 1.252 Mg/m <sup>3</sup>                          |                    |
| Absorption coefficient          | 0.632 mm <sup>-1</sup>                           |                    |
| F(000)                          | 664                                              |                    |
| Crystal size                    | 0.150 x 0.100 x 0.100 mm <sup>3</sup>            |                    |
| Crystal color/habit             | colorless prism                                  |                    |
| Theta range for data collection | 5.158 to 68.160°.                                |                    |
| Index ranges                    | -10 ≤ h ≤ 10, -20 ≤ k ≤ 20, -13 ≤ l ≤ 10         |                    |
| Reflections collected           | 21234                                            |                    |
| Independent reflections         | 2613 [R(int) = 0.0242]                           |                    |
| Completeness to theta = 67.000° | 98.3 %                                           |                    |
| Absorption correction           | Semi-empirical from equivalents                  |                    |
| Max. and min. transmission      | 0.864 and 0.810                                  |                    |

|                                   |                                             |
|-----------------------------------|---------------------------------------------|
| Refinement method                 | Full-matrix least-squares on F <sup>2</sup> |
| Data / restraints / parameters    | 2613 / 2 / 210                              |
| Goodness-of-fit on F <sup>2</sup> | 1.020                                       |
| Final R indices [I>2sigma(I)]     | R1 = 0.0228, wR2 = 0.0615                   |
| R indices (all data)              | R1 = 0.0229, wR2 = 0.0616                   |
| Absolute structure parameter      | 0.09(3)                                     |
| Extinction coefficient            | n/a                                         |
| Largest diff. peak and hole       | 0.178 and -0.125 e.Å <sup>-3</sup>          |

## X-Ray Crystallography Data for 63

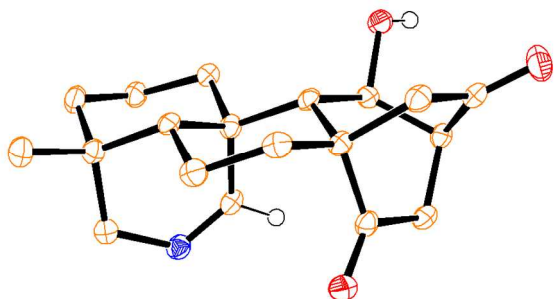

## X-Ray Data and Crystal Refinement for 63

A colorless needle 0.050 x 0.020 x 0.010 mm in size was mounted on a Cryoloop with Paratone oil. Data were collected in a nitrogen gas stream at 100(2) K using phi and omega scans. Crystal-to-detector distance was 60 mm and exposure time was 10 seconds per frame using a scan width of 2.0°. Data collection was 100.0% complete to 67.000° in  $q$ . A total of 22824 reflections were collected covering the indices,  $-13 \leq h \leq 13$ ,  $-8 \leq k \leq 8$ ,  $-13 \leq l \leq 13$ . 3360 reflections were found to be symmetry independent, with an  $R_{\text{int}}$  of 0.0744. Indexing and unit cell refinement indicated a primitive, monoclinic lattice. The space group was found to be P 21 (No. 4). The data were integrated using the Bruker SAINT software program and scaled using the SADABS software program. Solution by iterative methods (SHELXT) produced a complete heavy-atom phasing model consistent with the proposed structure. All non-hydrogen atoms were refined anisotropically by full-matrix least-squares (SHELXL-2014). All hydrogen atoms were placed using a riding model. Their positions were constrained relative to their parent atom using the appropriate HFIX command in SHELXL-2014.

|                                 |                                                  |                 |
|---------------------------------|--------------------------------------------------|-----------------|
| Empirical formula               | C <sub>21</sub> H <sub>31</sub> N O <sub>4</sub> |                 |
| Formula weight                  | 361.47                                           |                 |
| Temperature                     | 100(2) K                                         |                 |
| Wavelength                      | 1.54178 Å                                        |                 |
| Crystal system                  | Monoclinic                                       |                 |
| Space group                     | P 21                                             |                 |
| Unit cell dimensions            | a = 10.9297(3) Å                                 | a = 90°.        |
|                                 | b = 7.3691(2) Å                                  | b = 94.209(3)°. |
|                                 | c = 11.4432(4) Å                                 | g = 90°.        |
| Volume                          | 919.17(5) Å <sup>3</sup>                         |                 |
| Z                               | 2                                                |                 |
| Density (calculated)            | 1.306 Mg/m <sup>3</sup>                          |                 |
| Absorption coefficient          | 0.717 mm <sup>-1</sup>                           |                 |
| F(000)                          | 392                                              |                 |
| Crystal size                    | 0.050 x 0.020 x 0.010 mm <sup>3</sup>            |                 |
| Theta range for data collection | 3.873 to 68.414°.                                |                 |
| Index ranges                    | -13<=h<=13, -8<=k<=8, -13<=l<=13                 |                 |
| Reflections collected           | 22824                                            |                 |
| Independent reflections         | 3360 [R(int) = 0.0744]                           |                 |
| Completeness to theta = 67.000° | 100.0 %                                          |                 |
| Absorption correction           | Semi-empirical from equivalents                  |                 |
| Max. and min. transmission      | 0.929 and 0.818                                  |                 |
| Refinement method               | Full-matrix least-squares on F <sup>2</sup>      |                 |

|                                      |                                       |
|--------------------------------------|---------------------------------------|
| Data / restraints / parameters       | 3360 / 1 / 239                        |
| Goodness-of-fit on $F^2$             | 1.034                                 |
| Final R indices [ $I > 2\sigma(I)$ ] | R1 = 0.0410, wR2 = 0.0791             |
| R indices (all data)                 | R1 = 0.0549, wR2 = 0.0848             |
| Absolute structure parameter         | -0.16(18)                             |
| Extinction coefficient               | n/a                                   |
| Largest diff. peak and hole          | 0.206 and -0.159 e. $\text{\AA}^{-3}$ |
